1 **Title:** Hospital saturation and risk of death without receiving mechanical ventilation in  
2 hospitalized COVID-19 patients: a city-wide analysis

3

4 **Authors:**

5 Isaac Núñez MD<sup>1</sup>

6 Adrián Soto-Mota MD, PhD<sup>2</sup>

7

8 **Affiliations:**

9 1. Department of Medical Education, Instituto Nacional de Ciencias Médicas y  
10 Nutrición Salvador Zubirán, Mexico City, Mexico.

11 2. Metabolic Diseases Research Unit, Instituto Nacional de Ciencias Médicas y  
12 Nutrición Salvador Zubirán, Mexico City, Mexico.

13

14

15 **Corresponding author:**

16 Isaac Núñez MD, Department of Medical Education, Instituto Nacional de Ciencias  
17 Médicas y Nutrición Salvador Zubirán, Mexico City, Mexico. Vasco de Quiroga # 15,

18 Belisario Domínguez Sección XVI, Tlalpan, Mexico City, 14080, Mexico. Email:

19 isaac.nunezs@incmnsz.mx; Phone: 55 5487 0900

20

21 **Word count: 2721**

22 **Tables: 2**

23 **Figures: 3**

24



26 **Abstract (249 words, max 250)**

27 **Background:** Pneumonia is the hallmark of severe COVID-19, with supplemental oxygen  
28 requirement being the main indication for hospitalization. Refractory hypoxemia in these  
29 patients requires invasive mechanical ventilation (IMV) otherwise, death is imminent. In  
30 places with a high disease burden, availability of critical care experts, beds, or resources is  
31 challenged and many patients could die without receiving them.

32 **Methods:** We performed a retrospective cohort study using open databases from Mexico  
33 City about suspected or confirmed COVID-19 patients, health system saturation, and deaths  
34 between May 8<sup>th</sup>, 2020, and January 5<sup>th</sup>, 2021. After building a directed acyclic graph, we  
35 performed a binary logistic regression to identify the association between proposed causal  
36 variables and dying without receiving IMV (the outcome).

37 **Results:** We included 33 805 hospitalized patients with suspected or confirmed COVID-  
38 19, of which 19 820 (58.6%) did not require IMV and survived, 5416 (16.1%) required and  
39 received IMV, and 8569 (25.3%) required IMV but died without receiving it. Saturation of  
40 IMV-capable beds did not increase the odds of the outcome (odds ratio 1.07, 95%  
41 confidence interval 0.94-1.22 of 90% vs 50% occupancy), while general bed saturation (2,  
42 1.86-2.14 of 90% vs 50% occupancy) and IMV-capable to general bed ratio (1.64, 1.52-1.77  
43 for a ratio of 2 vs 0.5) did. Private healthcare decreased the odds of the outcome (0.12, 0.08-  
44 0.17) and dyspnea increased them (1.33, 1.19-1.9).

45 **Conclusions:** In Mexico City, increased general hospital bed saturation and IMV-capable  
46 to general bed ratio were associated with a higher risk of dying without receiving IMV.  
47 Private healthcare was the most protective factor.

48 **Keywords:** Hospital saturation, Mexico, COVID-19, health inequities, SARS-CoV-2

49 **Key messages:**

- 50       • Hospital saturation has been a central feature of public health messaging, but it is  
51       not known how outcomes relate to hospital saturation or capacity.
- 52       • In Mexico City, 90% of COVID-19 patients requiring mechanical ventilation died  
53       but less than half received it.
- 54       • Higher general bed saturation and an increased ratio of IMV-capable beds to general  
55       beds increased the probability of dying without being intubated while receiving  
56       private healthcare decreased this probability.
- 57       • Having available beds to intubate patients is possible thanks to the conversion of  
58       general beds, however, still yields suboptimal critical care.

59

60

61 **Introduction**

62 Humanitarian crises compromise the availability of human and clinical resources.<sup>1,2</sup> During  
63 the COVID-19 pandemic, the scarcity of hospital beds has been one of the most impactful  
64 documented shortages.<sup>3,4</sup> Even in high-income countries, the high demand for  
65 hospitalization beds overwhelmed healthcare systems and contributed to the observed  
66 excess of deaths.<sup>5,6</sup>

67

68 Since pneumonia is the hallmark of severe COVID-19<sup>7</sup>, the main indication for  
69 hospitalizing COVID-19 patients is the need for supplemental oxygen or invasive  
70 mechanical ventilation (IMV) if they develop refractory hypoxemia.<sup>8,9</sup> Therefore, multiple  
71 decisions must be made by health care providers when the demand surpasses the supply.  
72 Who should be admitted to an already saturated hospital? Of those admitted, who should be  
73 prioritized to receive mechanical ventilation?<sup>10</sup>

74

75 There is no easy answer for these questions, and their answers should take into account the  
76 current hospital's resources, the availability of other hospitals nearby, and of course, the  
77 severity of the patient's disease.<sup>6,10,11</sup>

78

79 What is more, these factors are highly dynamic and can drastically change within a few  
80 hours. A patient could arrive at a hospital that had 10 available beds that morning but filled  
81 them all by noon or could be clinically stable in the morning and quickly develop refractory  
82 hypoxemia due to pulmonary embolism, which would require a critical care bed.<sup>7</sup>

83

84 Because hospital saturation was deemed inevitable in many regions<sup>3,12</sup>, most countries  
85 have made efforts to increase their hospitalization capacity.<sup>13,14</sup> Mexico was not the  
86 exception and the government incremented the number of IMV-capable beds from 1800 in  
87 February 2020, to 6425 by April 2020.<sup>15,16</sup>

88

89 However, getting more beds and mechanical ventilators is not enough to provide the  
90 complex and specialized care required by critically ill patients.<sup>17,18</sup> Strikingly, there are  
91 only ~1900 registered adult or pediatric critical care specialists in Mexico<sup>19</sup> and,  
92 consequently, many patients were cared for by under-trained personnel.

93

94 Hospital saturation is one of the variables that guide Mexico's "semáforo epidemiológico"  
95 (epidemiological traffic light), a four-stage color-coded tool that dictates the intensity of  
96 lockdown measures in a given region for the following two weeks.<sup>20</sup> Both general bed and  
97 IMV-capable bed capacity are reported in daily national conferences and have never  
98 reported a 100% occupancy.<sup>21</sup> It is worth highlighting that reports that aggregate data from  
99 large regions in a country make it nearly impossible to reach 100% occupancy, even if most  
100 hospitals are completely saturated. Moreover, these regionally aggregated reports  
101 misleadingly downplay the contribution of hospital saturation to excess deaths.

102

103 Accordingly, a recent single-center study documented that of all patients admitted to a  
104 COVID-19 hospital in Mexico City that died, 45.6 % did not receive mechanical ventilation  
105 for lack of availability and 10.7% for "do not intubate/do not resuscitate" orders, suggesting  
106 that the main driver for dying without receiving IMV was indeed, hospital saturation.<sup>4</sup>

107

108 Estimating the contribution of hospital saturation to mortality and its related factors is  
109 essential to guide future efforts for improving the resilience of healthcare systems.  
110 However, data from isolated hospitals or brief periods during the pandemic are suboptimal  
111 for this purpose.

112

113 In this study, we aimed to identify the factors associated with dying of COVID-19 in  
114 patients who did not receive mechanical ventilation and to estimate the net contribution of  
115 hospital saturation at a city-wide level using open data from Mexico City, which has almost  
116 10 million habitants and has been one of the most heavily affected areas of the world during  
117 the COVID-19 pandemic.<sup>22</sup>

118

119

120 **Methods**

121 **Data sources**

122 We used three open data sources: the SINAVE Mexico City COVID-19 patient database  
123 (MxCov), the death registry of Mexico City (MxDeath), and the daily reports of health  
124 system saturation (MxHcare).<sup>23–25</sup>

125

126 MxCov includes anonymized clinical and socio-demographical information on all  
127 suspected COVID-19 cases that came into contact with the healthcare system (it is worth  
128 mentioning that Mexico has a complex, multi-institution healthcare system and a very large  
129 group of different private healthcare institutions). Individual identifiers, intubation status,  
130 comorbidities, site of residence, symptoms, and the healthcare system institution in which  
131 the patient was admitted were obtained from this database. MxDeath includes age, sex,  
132 cause of death as disclosed in the death certificate, a binary variable that describes if  
133 COVID-19 is mentioned as a contributing cause of death, state of residence, and the  
134 municipality of residence. Finally, MxHcare discloses information on the number and  
135 percentage of available general or IMV-capable hospital beds by healthcare system  
136 institutions.

137

138 Few dates had no daily report or had a repeated one, in these cases we used the mean of  
139 hospital saturation reported between the last and next available reports. Seven public  
140 healthcare systems (of which six are also included in MxCov) and private healthcare as a  
141 general category are included in MxHcare.

142



## 143 **Timeframe and patient selection**

144 Since May 5<sup>th</sup>, 2020, Mexico City's government has released daily reports about hospital  
145 availability, divided by type of bed (general and with IMV capability) and health system.  
146 The number of beds has been reported since May 8<sup>th</sup>, 2020, and private healthcare  
147 occupation was reported until January 5th, 2021. Thus, we included patients that were  
148 admitted into healthcare between May 8<sup>th</sup>, 2020, and January 5<sup>th</sup>, 2021. The most recent  
149 update of the MxCov database at the time of this analysis was on April 16th, 2021.  
150 Patients were excluded if they were hospitalized outside the study period, received  
151 ambulatory treatment, or were cared for in a healthcare system with no information about  
152 occupancy. Among 55 896 suspected or confirmed COVID-19 patients included in MxCov,  
153 33 805 were finally included in the analysis (**Figure 1**).

154

## 155 **Variable definitions**

156 COVID-19 was considered to be the cause of death in all patients of the MxCov database in  
157 whom a positive RT-PCR or antigen test was reported (confirmed COVID-19 patients). In  
158 patients who died without COVID-19 confirmation, we matched COVID-19 cases from  
159 MxCov with cases from MxDeath using: date of death, age, sex, state of residence,  
160 municipality of residence, and hospital as the place of death. Since MxDeath has individual  
161 identifiers for each registered death, it is possible to identify those patients who had more  
162 than one matching factor without having other patients with the same characteristics. If a  
163 death certificate reported confirmed or suspected COVID-19 as one of the causes of death,  
164 we considered it to be the cause of death.

165 Finally, three kinds of patients were identified: those who were hospitalized did not require  
166 IMV (and survived), those who required and received IMV, and those who died without  
167 receiving IMV.

168

### 169 **Statistical analysis**

170 The MxCov database includes patients with suspected or confirmed COVID-19 and, during  
171 the first stage, we performed the analysis using all hospitalized patients. We built a directed  
172 acyclic graph (DAG) using the ‘DAGitty’ online software version 3.0 to identify which  
173 variables could be related to patients dying because of not being intubated even though they  
174 needed it (the outcome).<sup>26,27</sup> Before building the DAG, we hypothesized that three  
175 variables were the main direct causes of this outcome: lack of bed availability, patient’s  
176 desire not to be intubated, and medical futility because of disease severity (**Figure 2**). None  
177 of these variables were directly observed.

178

179 Based on our DAG, we can estimate; the effect of the moment of the pandemic (represented  
180 by epidemiological week) on the outcome, the effect of hospital saturation (considering  
181 IMV-capable beds and general beds saturation in separate models) by controlling for the  
182 epidemiological week, the effect age by controlling for patient comorbidities, the effect of  
183 patient comorbidities by controlling for age and partially for socioeconomic status using  
184 private healthcare as a surrogate variable, the effect of private healthcare (as a surrogate for  
185 socioeconomic status) by controlling for patient comorbidities, and the effect of dyspnea  
186 (as a surrogate for disease severity) by controlling for patient age and partially for  
187 socioeconomic status using private healthcare as a surrogate variable.

188 We calculated the ratio of available IMV-capable beds and general hospital beds as an  
189 indicator of increased hospital-bed conversion and placed it in place of hospital saturation  
190 in an adjusted model (**Figure 2**).

191

192 We used descriptive statistics for analyzing the clinical and socio-demographical variables  
193 of patients that were hospitalized and did not require IMV, those that were hospitalized and  
194 received IMV, and those that were hospitalized and died without receiving IMV. We  
195 assumed those patients that received IMV and those that died without receiving it both  
196 required IMV.

197

198 We performed binary logistic regression models to obtain odds ratio and corresponding  
199 95% confidence intervals to evaluate the association of epidemiological week, age,  
200 presence of diabetes, obesity, hypertension, hospital saturation, epidemiological week (a  
201 surrogate for the moment of the pandemic), and private healthcare (a surrogate for  
202 socioeconomic status) with dying of COVID-19 without being intubated against being  
203 intubated. Age, hospital saturation, and IMV-general bed ratio were included in the models  
204 as continuous variables using cubic splines with three nodes.<sup>28</sup>

205

206 All analyses were conducted with R software version 4.0.0.

207

208 **Results**

209 **Clinical and socio-demographical characteristics**

210 Patient distribution was as follows: 19 820 (58.6%) did not require IMV and survived, 5416  
211 (16.1%) required and received IMV, and 8569 (25.3%) required IMV but died without  
212 receiving it. Of those who required and received IMV 4129 (76.2%) died, resulting in a  
213 mortality of 90.7% (12 698 people out of the 13 985 patients that required mechanical  
214 ventilation). Clinical and socio-demographical characteristics are shown in **Table 1**.

215

216 **Regression analysis**

217 Results of the logistic regression analysis are shown in **Table 2**. Results for continuous  
218 variables and epidemiological week are also shown in **Figure 3**. Being admitted at a later  
219 epidemiological week was associated with increased odds of death without IMV (OR 1.44;  
220 95% CI 1.34-1.54 comparing week 54 with week 37) while an early admission conferred  
221 decreased odds (0.68, 95% CI 0.64-0.73 comparing week 9 with week 37). A higher  
222 percentage of IMV-capable bed occupation was not associated with increased odds of death  
223 without IMV (OR 1.07; 95% CI 0.94-1.22 comparing 90% with 50% saturation). Lower  
224 saturation of IMV-capable beds was associated with increased odds of dying without IMV  
225 (OR 1.31; 95% CI 1.23-1.4 comparing 30% with 50% saturation). Conversely, a higher  
226 percentage of general bed occupation was associated with increased odds of death without  
227 IMV (OR 2; 95% CI 1.86-2.14 comparing 90% with 50% saturation). An elevated ratio of  
228 IMV-capable to general beds increased the odds of not receiving IMV (OR 1.64, 95% CI

229 1.52-1.77 comparing 2 with 0.5) but a decreased ratio dropped the odds (OR 0.47, 95% CI  
230 0.42-0.52 comparing 0.1 with 0.5).

231

232 Private healthcare substantially decreased the odds of the outcome (OR 0.12, 95% CI 0.08-  
233 0.17), while having dyspnea increased the odds (OR 1.33, 95% CI 1.19-1.5). Among  
234 comorbidities, diabetes and hypertension were associated with higher odds (OR 1.18 and  
235 1.09), and obesity with lower odds (OR 0.89).

236

237 **Discussion**

238 To our knowledge, this is the first study trying to estimate the attributable proportion of  
239 deaths to hospital saturation in Mexico. Additionally, evaluated which factors are  
240 associated with dying of COVID-19 without having received IMV.

241

242 It is paramount to make a difference between patients who did not desire to receive IMV,  
243 from those who did not receive it because their clinicians considered it futile, and, finally,  
244 from those who wanted to receive it, were considered eligible by their healthcare providers  
245 and had no access to it.

246

247 A patient's desire to be or not intubated is a complex choice. Literature is scarce, but  
248 available studies report that age and pre-existing diseases are associated with this.<sup>29,30</sup>

249 Futility refers to a very low probability of survival and substantial morbidity, thus a lack of  
250 benefit from invasive maneuvers. While this is extremely complex in itself, deciding who  
251 gets a bed or a ventilator among people in whom critical care normally would not be  
252 considered to be futile.<sup>10</sup> Normally, futility would be the thing that a medical team would  
253 consider to determine if a patient benefits or not from critical care.<sup>29</sup>

254

255 Interestingly, a recent survey among physicians put good prognosis, lower age, and having  
256 caregiving responsibilities among the main criteria to account for when choosing who gets  
257 the last ICU bed.<sup>31</sup> When proposed with several methods to choose who gets the last bed,  
258 most chose to use a pre-established set of rules by the health department or chose to defer  
259 the decision to the senior physician.<sup>31</sup>

260 Medical futility is extremely complex to decide and can only be accounted for by having a  
261 direct conversation with the medical team that treated a given patient. Variables that could  
262 be related to this are acute disease severity, pre-existing comorbidities, age, and short  
263 expected survival with any therapeutic maneuver. We used dyspnea, for example, as a  
264 surrogate for disease severity. The increased odds of outcome seen in these patients could  
265 be due to increased disease severity (futility) but this is only a possible symptom of severe  
266 disease and some patients present with “happy hypoxemia”, in which low oxygenation is  
267 asymptomatic.<sup>32</sup>

268

269 To explain the counterintuitive lower odds we observed of dying without being intubated  
270 precisely when IMV-capable beds were most saturated, it is worth highlighting that a  
271 higher IMV-capable-beds to general-beds-ratio suggest that more general beds were  
272 “converted” into IMV-capable beds to deal with the high demand of IMV. Therefore, the  
273 number of patients receiving IMV increased, and consequently, the proportion of patients  
274 who died without it declined. In summary, the higher demand for IMV saturated the general  
275 bed's pool and turned IMV-bed saturation into an inaccurate pandemic severity indicator.

276

277 This is further supported by the extremely high mortality of 90% among patients that  
278 required intubation, as improvised and suboptimal care became more likely because the  
279 number of healthcare providers with critical care training remained constant. For context, a  
280 recent international study in African high care or intensive care units reported a “high  
281 mortality” of 48.9%.<sup>33</sup>

282

283 The lower odds of dying without receiving mechanical ventilation we observed in those  
284 cared for in private healthcare institutions is consistent with the worse general outcomes  
285 seen in people with lower socioeconomic status in Mexico and other Latin American  
286 countries.<sup>34,35</sup> This underlines the need for increased support for those in a vulnerable  
287 position.

288

289 Furthermore, the outcomes difference between different epidemiological weeks is  
290 consistent with a previous analysis in which the place of death (hospital or home) differed  
291 according to the date of death, with domiciliary deaths increasing from 8% to 21% by the  
292 end of 2020.<sup>36</sup>

293

#### 294 **Strengths and limitations**

295 Among the limitations of our study are the use of repurposed data and the lack of individual  
296 center data. Even if we matched hospital saturation with their respective health system  
297 affiliation, individual hospitals could have many different levels of occupation.

298

299 We cannot estimate the direct effect of clinical futility and socioeconomic status, which are  
300 important variables that could influence the decision of not offering or receiving IMV.

301 However, a previous study conducted in Mexico City showed a low proportion of patients  
302 voluntarily refusing IMV, and it is reasonable to expect this was the case in other hospitals.

303 <sup>4</sup> Additionally, the fact that the median age of those who died without IMV was low (66  
304 years old) and that their comorbidities frequency and distribution was similar in the other  
305 groups, suggests it is unlikely that clinical futility was a frequent reason for not offering  
306 critical care or that a large proportion of patients voluntarily refused to receive IMV.



307 On the other hand, our study also has several strengths. We used open data from a large  
308 metropolitan area that is updated regularly. Additionally, drew a DAG before analyzing or  
309 determining which were the most probable relationships between variables and what was  
310 reasonable to expect from our analysis. Finally, because of how our data was curated, we  
311 could reasonably ascertain the cause of death in most cases.  
312

313 **Conclusion**

314 Our study suggests that the higher demand for IMV forced the conversion of general  
315 hospital beds and their saturation. The high mortality we found is consistent with this  
316 because hospital beds can be quickly increased but specialized personnel takes time to train.  
317 While we cannot ascertain the wishes of every patient, it is highly unlikely that most people  
318 voluntarily refused to be intubated, our data suggest that hospital saturation was indeed, a  
319 cause of death in these patients.

320

321 Regional aggregates of hospital saturation are inaccurate indicators and should not be  
322 emphasized while communicating the pandemic status to the population because they sub  
323 estimate the high contribution of hospital saturation to mortality.

324

325 **Ethics approval**

326 This study does not require ethics board approval because it used publicly available  
327 anonymized data, with no interaction between the researchers and individuals.

328

329 **Funding**

330 None.

331

332 **Data availability**

333 All utilized data is freely available in respective government webpages and all used code  
334 will be openly available with the final version of the article.

335

336

337 **Conflict of interests**

338 The authors declare they do not have conflicts of interest.

339

340 **Acknowledgments**

341 We would like to thank medical residents, nursery personnel, and other healthcare workers.

342 Your work has been invaluable. Also, we thank scientists around the world who have

343 devoted themselves to continue working and supporting science communication.

344

345 **References**

- 346 1. The Lancet. Humanitarian crises in a global pandemic. *Lancet*. 2020;396(10249):447.
- 347 2. McCabe R, Kont MD, Schmit N, et al. Modelling intensive care unit capacity under  
348 different epidemiological scenarios of the COVID-19 pandemic in three Western  
349 European countries. *Int J Epidemiol*. 2021;dyab034.
- 350 3. Panamerican Health Organization. PAHO calls for boosting hospital capacity to cope  
351 with COVID-19 surge. 2020 [cited 25 may 2021]. Available at:  
352 [https://www.paho.org/en/news/9-12-2020-paho-calls-boosting-hospital-capacity-cope-](https://www.paho.org/en/news/9-12-2020-paho-calls-boosting-hospital-capacity-cope-covid-19-surge)  
353 [covid-19-surge](https://www.paho.org/en/news/9-12-2020-paho-calls-boosting-hospital-capacity-cope-covid-19-surge)
- 354 4. Olivas-Martínez A, Cárdenas-Fragoso JL, Jiménez JV, et al. In-hospital mortality from  
355 severe COVID-19 in a tertiary care center in Mexico City; causes of death, risk factors  
356 and the impact of hospital saturation. *PLOS ONE*. 2021;16(2):e0245772.
- 357 5. Islam N, Shkolnikov VM, Acosta RJ, et al. Excess deaths associated with covid-19  
358 pandemic in 2020: age and sex disaggregated time series analysis in 29 high income  
359 countries. *BMJ*. 2021;n1137.
- 360 6. Asch DA, Sheils NE, Islam MN, et al. Variation in US Hospital Mortality Rates for  
361 Patients Admitted With COVID-19 During the First 6 Months of the Pandemic. *JAMA*  
362 *Intern Med*. 2021;181(4):471.
- 363 7. Berlin DA, Gulick RM, Martinez FJ. Severe Covid-19. *N Engl J Med*.  
364 2020;383(25):2451-60.
- 365 8. Gandhi RT, Lynch JB, del Rio C. Mild or Moderate Covid-19. *N Engl J Med*.  
366 2020;383(18):1757-66.
- 367 9. Miklowski M, Jansen B, Auron M, Whinney C. The hospitalized patient with COVID-  
368 19 on the medical ward: Cleveland Clinic approach to management. *Cleve Clin J Med*.  
369 2020;ccjom;ccjm.87a.ccc064v1.
- 370 10. Truog RD, Mitchell C, Daley GQ. The Toughest Triage — Allocating Ventilators in a  
371 Pandemic. *N Engl J Med*. 2020;382(21):1973-5.
- 372 11. Ranney ML, Griffeth V, Jha AK. Critical Supply Shortages — The Need for  
373 Ventilators and Personal Protective Equipment during the Covid-19 Pandemic. *N Engl*  
374 *J Med*. 2020;382(18):e41.
- 375 12. Cavallo JJ, Donoho DA, Forman HP. Hospital Capacity and Operations in the  
376 Coronavirus Disease 2019 (COVID-19) Pandemic—Planning for the Nth Patient.  
377 *JAMA Health Forum*. 2020;1(3):e200345.
- 378 13. McCabe R, Schmit N, Christen P, et al. Adapting hospital capacity to meet changing  
379 demands during the COVID-19 pandemic. *BMC Med*. 2020;18(1):329.

- 380 14. Lefrant J-Y, Fischer M-O, Potier H, et al. A national healthcare response to intensive  
381 care bed requirements during the COVID-19 outbreak in France. *Anaesth Crit Care*  
382 *Pain Med.* 2020;39(6):709-15.
- 383 15. Government of Mexico. March 18th conference. [Internet]. Information about  
384 coronavirus, Government of Mexico. 2020 [cited 25 may 2021]. Available at:  
385 <https://coronavirus.gob.mx/2020/03/18/conferencia-18-de-marzo/>
- 386 16. Antonio Baranda, Claudia Guerrero. Tiene México 6,425 camas para Covid-19.  
387 [Internet]. REFORMAR. 2020 [cited 25 may 2021]. Available at:  
388 [https://www.reforma.com/aplicacioneslibre/preacceso/articulo/default.aspx?\\_\\_rval=1&](https://www.reforma.com/aplicacioneslibre/preacceso/articulo/default.aspx?__rval=1&urlredirect=https://www.reforma.com/tiene-mexico-6-425-camas-para-covid-19/ar1912899?referer=-7d616165662f3a3a6262623b7b706d7a663b767a783b786d3a)  
389 [urlredirect=https://www.reforma.com/tiene-mexico-6-425-camas-para-covid-](https://www.reforma.com/tiene-mexico-6-425-camas-para-covid-19/ar1912899?referer=-7d616165662f3a3a6262623b7b706d7a663b767a783b786d3a)  
390 [19/ar1912899?referer=-7d616165662f3a3a6262623b7b706d7a663b767a783b786d3a](https://www.reforma.com/tiene-mexico-6-425-camas-para-covid-19/ar1912899?referer=-7d616165662f3a3a6262623b7b706d7a663b767a783b786d3a)
- 391 17. Taylor L. Covid-19: How denialism led Mexico's disastrous pandemic control effort.  
392 *BMJ.* 2020;m4952.
- 393 18. Ñamendys-Silva SA. Case fatality ratio of COVID-19 patients requiring invasive  
394 mechanical ventilation in Mexico: an analysis of nationwide data. *Crit Care.*  
395 2021;25(1):68.
- 396 19. Heinze-Martin G, Olmedo-Canchola VH, Bazán-Miranda G, Bernard-Fuentes NA,  
397 Guízar-Sánchez DP. Los médicos especialistas en México. *Gac México.* 4 de mayo de  
398 2018;154(3):555.
- 399 20. Cortés-Alcalá R. Lineamiento para la estimación de riesgos del semáforo por regiones  
400 COVID-19. [Internet]. Government of Mexico; 2020 [cited 25 may 2021]. Available at:  
401 [https://coronavirus.gob.mx/wp-content/uploads/2020/10/SemaforoCOVID\\_Metodo.pdf](https://coronavirus.gob.mx/wp-content/uploads/2020/10/SemaforoCOVID_Metodo.pdf)
- 402 21. Secretaría de Salud, Universidad Nacional Autónoma de México. Datos Estatales del  
403 Sistema de Información de la Red IRAG. [Internet]. Sistema de Información de la Red  
404 IRAG. 2021 [cited 25 may 2021]. Available at: [https://www.gits.igg.unam.mx/red-irag-](https://www.gits.igg.unam.mx/red-irag-dashboard/reviewHome)  
405 [dashboard/reviewHome](https://www.gits.igg.unam.mx/red-irag-dashboard/reviewHome)
- 406 22. Palacio Mejía LS, Wheatley Fernández JL, Ordoñez Hernández I, et al. Estimación del  
407 exceso de mortalidad por todas las causas durante la pandemia del Covid-19 en  
408 México. *Salud Pública México.* 2021;63(2, Mar-Abr):211-24.
- 409 23. Gobierno de la Ciudad de México. COVID-19 Sistema Nacional de Vigilancia  
410 Epidemiológica (SINAVE) Ciudad de México [Internet]. 2021 [cited 28 april 2021].  
411 Available at: <https://datos.cdmx.gob.mx/dataset/base-covid-sinave>
- 412 24. Gobierno de la Ciudad de México. Actas de defunción del registro civil de la Ciudad de  
413 México. [Internet]. 2021. Available at: [https://datos.cdmx.gob.mx/dataset/actas-de-](https://datos.cdmx.gob.mx/dataset/actas-de-defuncion-en-el-registro-civil-de-la-ciudad-de-mexico/resource/d683ec6e-171a-4825-a523-2cddf30f9894)  
414 [defuncion-en-el-registro-civil-de-la-ciudad-de-mexico/resource/d683ec6e-171a-4825-](https://datos.cdmx.gob.mx/dataset/actas-de-defuncion-en-el-registro-civil-de-la-ciudad-de-mexico/resource/d683ec6e-171a-4825-a523-2cddf30f9894)  
415 [a523-2cddf30f9894](https://datos.cdmx.gob.mx/dataset/actas-de-defuncion-en-el-registro-civil-de-la-ciudad-de-mexico/resource/d683ec6e-171a-4825-a523-2cddf30f9894)

- 416 25. Gobierno de la Ciudad de México. Reporte diario sobre COVID-19 en la Ciudad de  
417 México. [Internet]. 2020. Available at:  
418 [https://covid19.cdmx.gob.mx/comunicacion/tipo/Reporte%20diario%20sobre%20COV](https://covid19.cdmx.gob.mx/comunicacion/tipo/Reporte%20diario%20sobre%20COVID-19)  
419 [ID-19](https://covid19.cdmx.gob.mx/comunicacion/tipo/Reporte%20diario%20sobre%20COVID-19)
- 420 26. Hernán M, Robins J. Causal Inference: What If. Boca Raton, FL: Chapman &  
421 Hall/CRC; 2020.
- 422 27. Textor J, Hardt J, Knüppel S. DAGitty: A Graphical Tool for Analyzing Causal  
423 Diagrams. *Epidemiology*. 2011;22(5):745.
- 424 28. Shepherd BE, Rebeiro PF. Assessing and Interpreting the Association Between  
425 Continuous Covariates and Outcomes in Observational Studies of HIV Using Splines. *J*  
426 *Acquir Immune Defic Syndr*. 2017;74(3):4.
- 427 29. Wilkinson DJ, Savulescu J. Knowing when to stop: futility in the ICU. *Curr Opin*  
428 *Anaesthesiol*. 2011;24(2):160-5.
- 429 30. van der Veer T, van der Sar-van der Brugge S, Paats MS, et al. Do-not-intubate status  
430 and COVID-19 mortality in patients admitted to Dutch non-ICU wards. *Eur J Clin*  
431 *Microbiol Infect Dis*. 2021; 12:1-3.
- 432 31. Street AE, Street DJ, Flynn GM. Who Gets the Last Bed? A Discrete-Choice  
433 Experiment Examining General Population Preferences for Intensive Care Bed  
434 Prioritization in a Pandemic. *Med Decis Making*. 2021;41(4):408-18.
- 435 32. Dhont S, Derom E, Van Braeckel E, Depuydt P, Lambrecht BN. The pathophysiology  
436 of ‘happy’ hypoxemia in COVID-19. *Respir Res*. 2020;21(1):198.
- 437 33. Biccard BM, Gopalan PD, Miller M, et al. Patient care and clinical outcomes for  
438 patients with COVID-19 infection admitted to African high-care or intensive care units  
439 (ACCCOS): a multicentre, prospective, observational cohort study. *The Lancet*.  
440 2021;397(10288):1885-94.
- 441 34. Najera H, Ortega-Avila AG. Health and Institutional Risk Factors of COVID-19  
442 Mortality in Mexico, 2020. *Am J Prev Med*. 2021;60(4):471-7.
- 443 35. Mena GE, Martinez PP, Mahmud AS, Marquet PA, Buckee CO, Santillana M.  
444 Socioeconomic status determines COVID-19 incidence and related mortality in  
445 Santiago, Chile. *Science*. 2021;eabg5298.
- 446 36. Sarahí Aguilar, Arizpe M. Las causas y los lugares de muerte durante la pandemia en la  
447 CDMX. [Internet]. Taller de datos. 2021 [cited 27 may 2021]. Available at:  
448 [https://datos.nexos.com.mx/las-causas-y-los-lugares-de-muerte-durante-la-pandemia-](https://datos.nexos.com.mx/las-causas-y-los-lugares-de-muerte-durante-la-pandemia-en-la-cdmx/)  
449 [en-la-cdmx/](https://datos.nexos.com.mx/las-causas-y-los-lugares-de-muerte-durante-la-pandemia-en-la-cdmx/)

451 **TABLE 1. Clinical and sociodemographic characteristics of hospitalized COVID-19**  
 452 **patients according to the outcome.**

| <b>Variable</b>                        | <b>Did not require IMV (survived)</b> | <b>Received IMV</b> | <b>Died without receiving IMV</b> |
|----------------------------------------|---------------------------------------|---------------------|-----------------------------------|
| <b>Number of patients (n= 33 805)</b>  | 19 820 (58.6)                         | 5416 (16.1)         | 8569 (25.3)                       |
| <b>Age (median, IQR)</b>               | 54 (40-65)                            | 61 (51-70)          | 66 (56-75)                        |
| <b>Sex</b>                             | -                                     | -                   | -                                 |
| <b>-Female</b>                         | 8805 (44.4)                           | 1893 (35)           | 3105 (36.2)                       |
| <b>-Male</b>                           | 11 015 (55.6)                         | 3523 (65)           | 5464 (63.8)                       |
| <b>Positive antigen or RT-PCR test</b> | 9380 (47.3)                           | 3325 (61.4)         | 5317 (62)                         |
| <b>Deaths</b>                          | 0 (0)                                 | 4129 (76.2)         | 8569 (100)                        |
| <b>Comorbidities</b>                   | -                                     | -                   | -                                 |
| <b>-Obesity</b>                        | 3632 (18.3)                           | 1239 (22.9)         | 1491 (17.4)                       |
| <b>-Hypertension</b>                   | 5458 (27.5)                           | 2010 (37.1)         | 3487 (40.7)                       |
| <b>-Diabetes</b>                       | 4681 (23.6)                           | 1764 (32.6)         | 2959 (34.5)                       |
| <b>-Heart disease</b>                  | 960 (4.8)                             | 273 (5)             | 473 (5.5)                         |
| <b>Presence of dyspnea</b>             | 12 893 (65.1)                         | 4425 (81.7)         | 6895 (80.5)                       |
| <b>Private healthcare</b>              | 1712 (8.6)                            | 325 (6)             | 105 (1.2)                         |

453 Continuous variables are expressed as the median and interquartile range (IQR). Counts are  
454 expressed as the total and percentage. IMV: invasive mechanical ventilation, RT-PCR: real-  
455 time-polymerase chain reaction.

456



457 **TABLE 2. Logistic regression analysis of possible causal variables and the outcome of**  
 458 **death without receiving invasive mechanical ventilation.**

| <b>Variable</b>                                  | <b>OR (95% CI)</b> |
|--------------------------------------------------|--------------------|
| <b>Epidemiological week</b>                      | -                  |
| 19                                               | 0.68 (0.64-0.73)   |
| 27                                               | 0.81 (0.78-0.84)   |
| 37                                               | Reference          |
| 47                                               | 1.24 (1.19-1.29)   |
| 54                                               | 1.44 (1.34-1.54)   |
| <b>Percentage occupation of IMV-capable beds</b> | -                  |
| 30%                                              | 1.31 (1.23-1.4)    |
| 50%                                              | Reference          |
| 70%                                              | 0.97 (0.94-1.01)   |
| 90%                                              | 1.07 (0.94-1.22)   |
| <b>Percentage occupation of general beds</b>     | -                  |
| 30%                                              | 1.05 (0.89-1.22)   |
| 50%                                              | Reference          |
| 70%                                              | 1.2 (1.13-1.27)    |
| 90%                                              | 2 (1.86-2.14)      |
| <b>IMV-capable to general bed ratio</b>          | -                  |

|                           |                  |
|---------------------------|------------------|
| 0.1                       | 0.47 (0.42-0.52) |
| 0.3                       | 0.69 (0.65-0.73) |
| 0.5                       | Reference        |
| 0.8                       | 1.4 (1.33-1.48)  |
| 1                         | 1.56 (1.45-1.67) |
| 2                         | 1.64 (1.52-1.77) |
| <b>Private healthcare</b> | 0.12 (0.08-0.17) |
| <b>Age</b>                | -                |
| 20                        | 0.18 (0.15-0.23) |
| 30                        | 0.33 (0.28-0.37) |
| 50                        | Reference        |
| 70                        | 2.28 (2.15-2.42) |
| 80                        | 3.13 (2.88-3.4)  |
| <b>Diabetes</b>           | 1.18 (1.06-1.3)  |
| <b>Hypertension</b>       | 1.09 (0.98-1.2)  |
| <b>Obesity</b>            | 0.89 (0.79-1)    |
| <b>Dyspnea</b>            | 1.33 (1.19-1.5)  |

459 Details of covariate adjustment for individual models are provided in the methods section.

460 OR: Odds ratio; CI: Confidence interval; IMV: Invasive mechanical ventilation

461

462

463

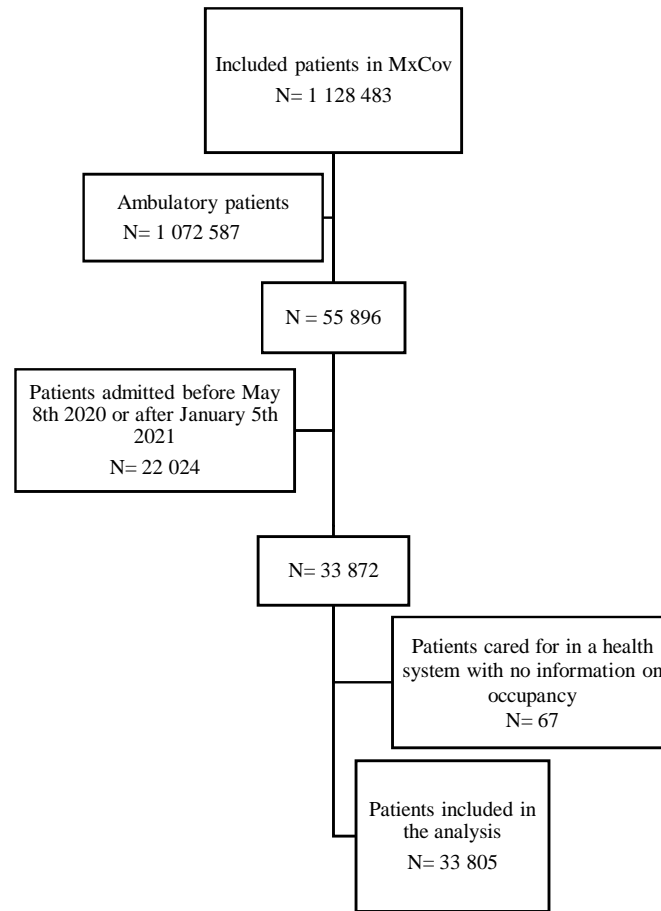

464

465 **FIGURE 1. Patient selection flowchart.**

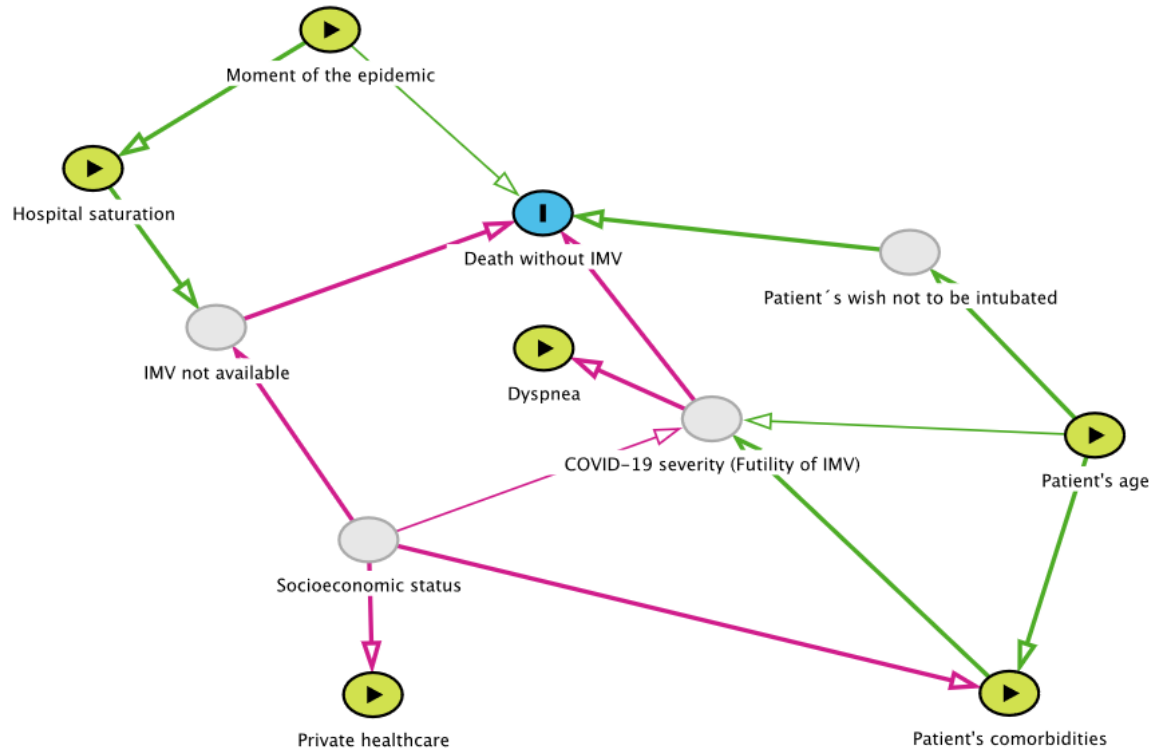

466

467 **FIGURE 2.** Directed Acyclic Graph (DAG) of hypothesized causal variables on death  
468 without receiving invasive mechanical ventilation (IMV). The blue node is the outcome,  
469 green nodes are observed exposures, and gray nodes are unobserved exposures. Hospital  
470 saturation was replaced by IMV-capable to general bed ratio in an additional adjusted  
471 logistic regression model.

472

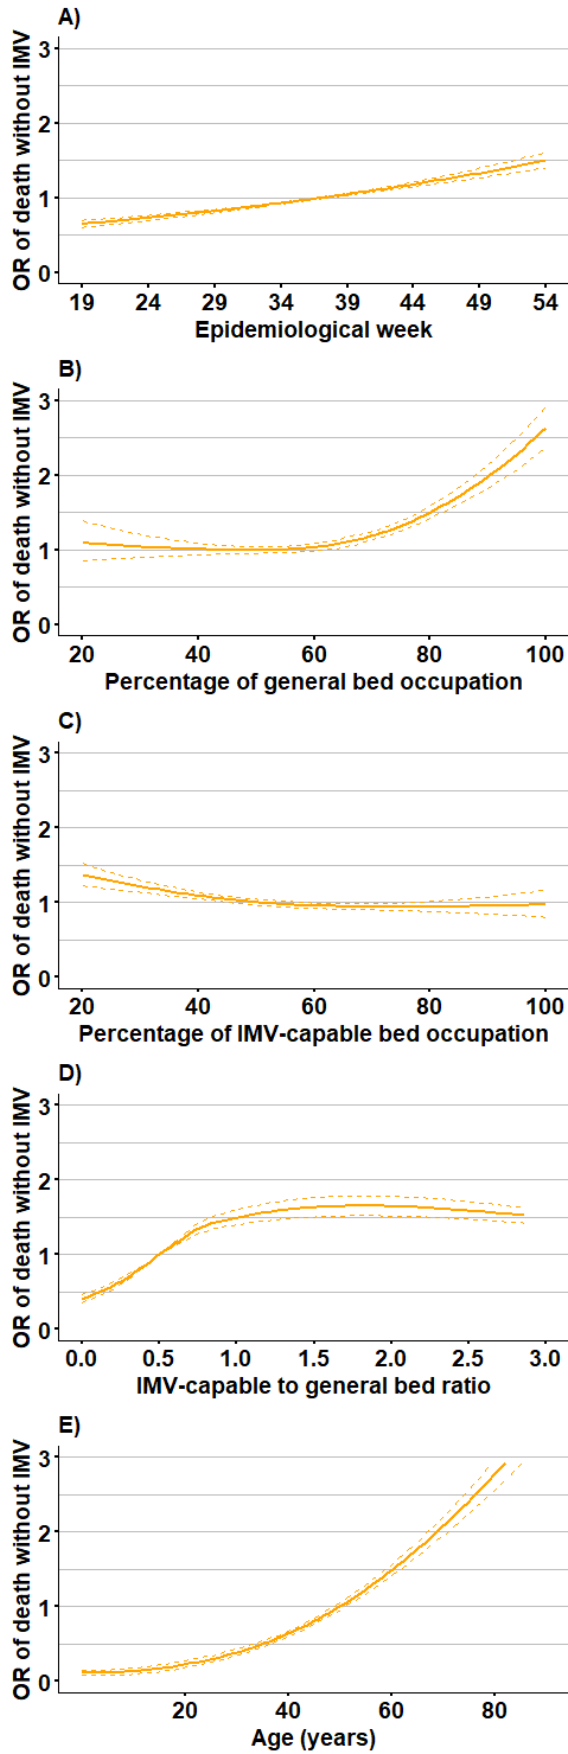

474 **FIGURE 3. Association between proposed causal variables and dying without**  
475 **receiving invasive mechanical ventilation.** Variables included are A) epidemiologic  
476 week, B) the percentage of general bed occupation, C) percentage of invasive mechanical  
477 ventilation-capable bed occupation, D) invasive mechanical ventilation-capable to general  
478 bed ratio, and E) age. OR: Odds ratio; IMV: invasive mechanical ventilation. Shown are  
479 adjusted OR (except epidemiological week, which was not adjusted, details on adjustments  
480 are disclosed in the methods section) with corresponding 95% confidence intervals.  
481
